# Supplementary material for: Innovative dual-contrast nanocoating for central venous catheters: prolonged infection resistance and enhanced imaging
Source: Royal Society of Chemistry journal article supplement (doi:10.1039/d4tb02461c), 2025-01-01
Supplement: d4tb02461c1.pdf [file d4tb02461c1.pdf]

**Supplementary material**

**Innovative dual-contrast nanocoating for central venous catheters: Prolonged infection  
resistance and enhanced imaging**

Hasti Tashak Golroudbari<sup>a,#</sup>, Somayeh Mojtabavi<sup>a,#</sup>, Mostafa Mohammadi<sup>b</sup>, Ahmad Reza  
Dehpour<sup>c</sup>, Seyed Hossein Ahmadi Tafti<sup>d</sup>, Seyed Mohsen Ahmadi Tafti<sup>e</sup>, and Mohammad Ali  
Faramarzi<sup>a,\*</sup>

*<sup>a</sup> Department of Pharmaceutical Biotechnology, Faculty of Pharmacy and Biotechnology  
Research Center, Tehran University of Medical Sciences, P.O. Box 14155–6451, Tehran  
1417614411, Iran*

*<sup>b</sup> Department of Intensive Care Unit, Imam Khomeini Hospital, Tehran University of Medical  
Sciences, Tehran, Iran*

*<sup>c</sup> Department of Pharmacology, School of Medicine, Tehran University of Medical Sciences,  
Tehran, Iran*

*<sup>d</sup> Tehran Heart Center, Tehran University of Medical Sciences, Tehran, Iran*

*<sup>e</sup> Division of Colorectal Surgery, Department of Surgery, Tehran University of Medical  
Sciences, Tehran, Iran*

-----  
\*Corresponding author: M.A. Faramarzi, Telefax: +98-21-66954712, E-mail:

faramarz@tums.ac.ir

<sup>#</sup>H. Tashak Golroudbari and S. Mojtabavi contributed equally as the first author

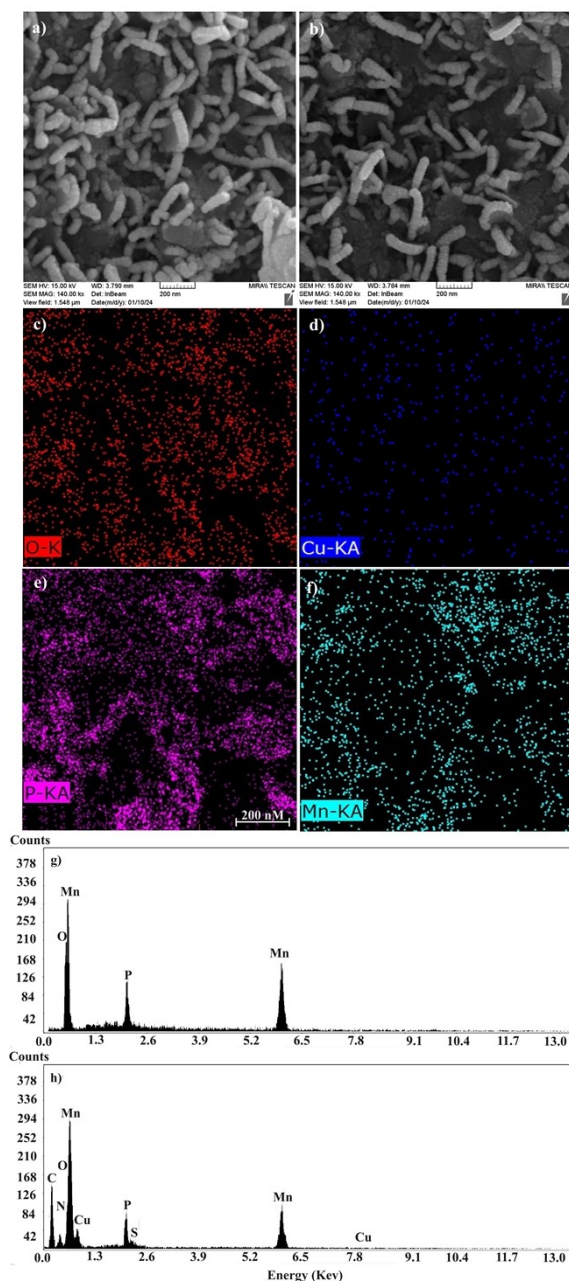

**Figure S1.** Scanning electron microscope (SEM) imaging of (a)  $\text{Mn}_3(\text{PO}_4)_2 \cdot \text{NSs}$  and (b)  $\text{laccase}@\text{Mn}_3(\text{PO}_4)_2 \cdot \text{HNSs}$ ; Energy dispersive X-ray analysis (EDX) mapping of (c) oxygen, (d) copper, (e) phosphor, and (f) manganese for a cross-section of the prepared  $\text{laccase}@\text{Mn}_3(\text{PO}_4)_2 \cdot \text{HNSs}$ ; EDX spectra of the synthesized (g)  $\text{Mn}_3(\text{PO}_4)_2 \cdot \text{NSs}$  and (h)  $\text{laccase}@\text{Mn}_3(\text{PO}_4)_2 \cdot \text{HNSs}$ . The immobilization was performed in phosphate buffer (100 mM, pH 7.5) containing laccase activity of  $0.8 \text{ U mL}^{-1}$  at  $25 \text{ }^\circ\text{C}$ .

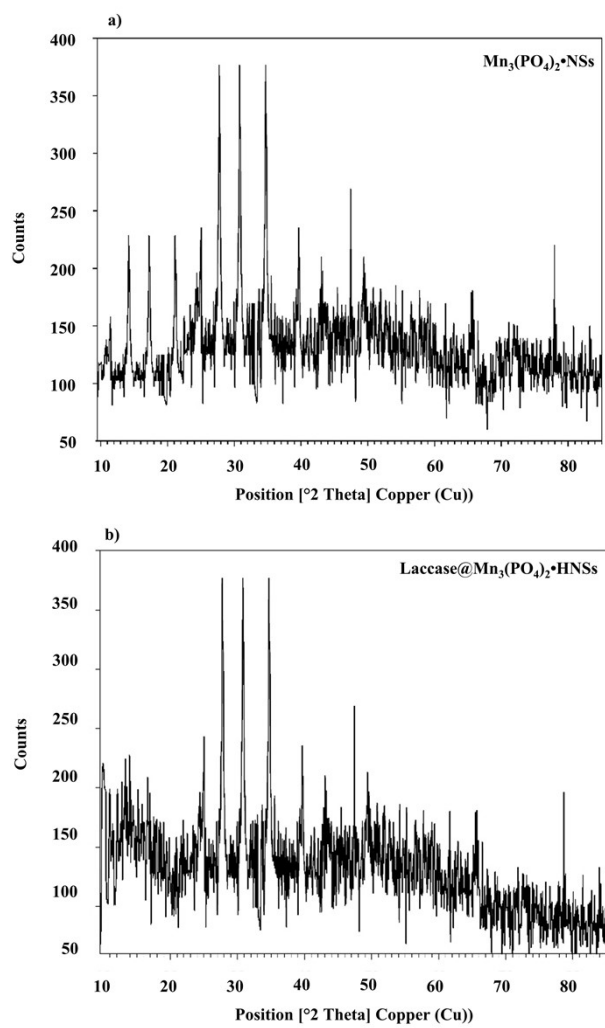

**Figure S2.** X-ray diffraction analysis (XRD) of the constructed (a)  $\text{Mn}_3(\text{PO}_4)_2 \cdot \text{NSs}$  and (b)  $\text{laccase}@\text{Mn}_3(\text{PO}_4)_2 \cdot \text{HNSs}$ , respectively.

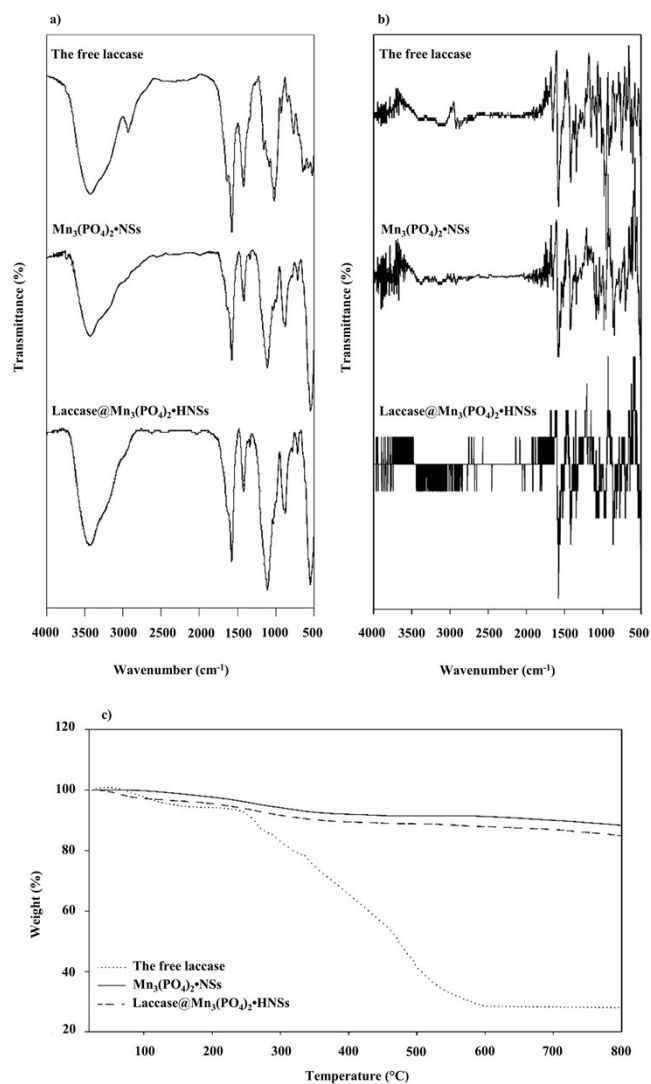

**Figure S3.** (a) Fourier-transform infrared spectroscopy (FTIR), (b) the first derivative spectra, and (c) Thermogravimetric analysis (TGA) curves of the free laccase,  $\text{Mn}_3(\text{PO}_4)_2\cdot\text{NSs}$ , and  $\text{laccase}@Mn_3(\text{PO}_4)_2\cdot\text{HNSs}$ . For TGA analysis, the temperature increased at  $10\text{ }^\circ\text{C min}^{-1}$  from  $150$  to  $800\text{ }^\circ\text{C}$ .

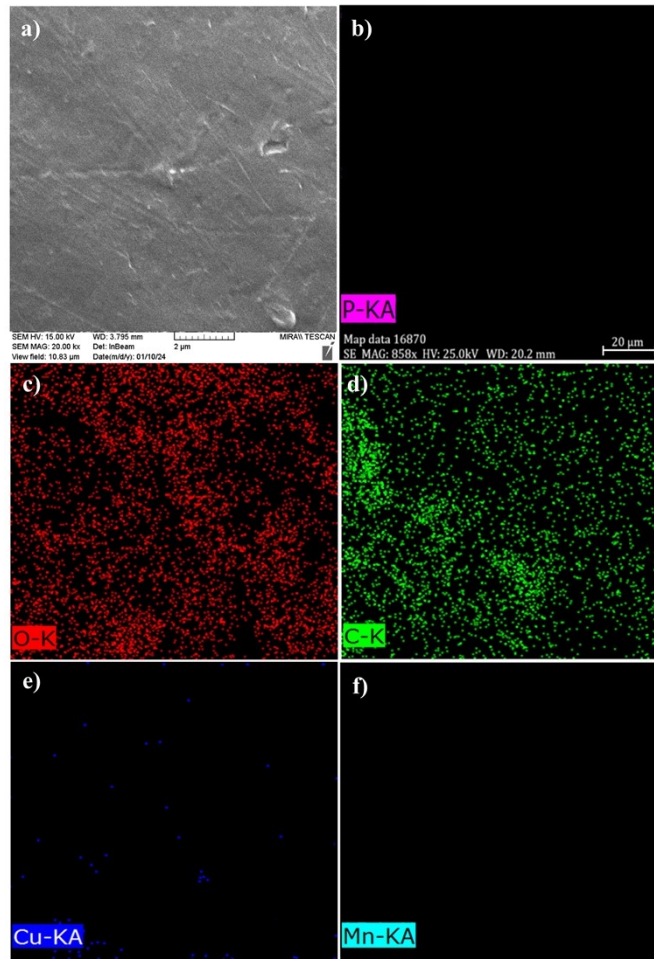

**Figure S4.** Scanning electron microscope (SEM) imaging of (a) the bare central venous catheters (CVCs); Energy dispersive X-ray analysis (EDX) mapping of (b) phosphor, (c) oxygen, (d) carbon, (e) copper, and (f) manganese for a cross-section of the bare CVC.

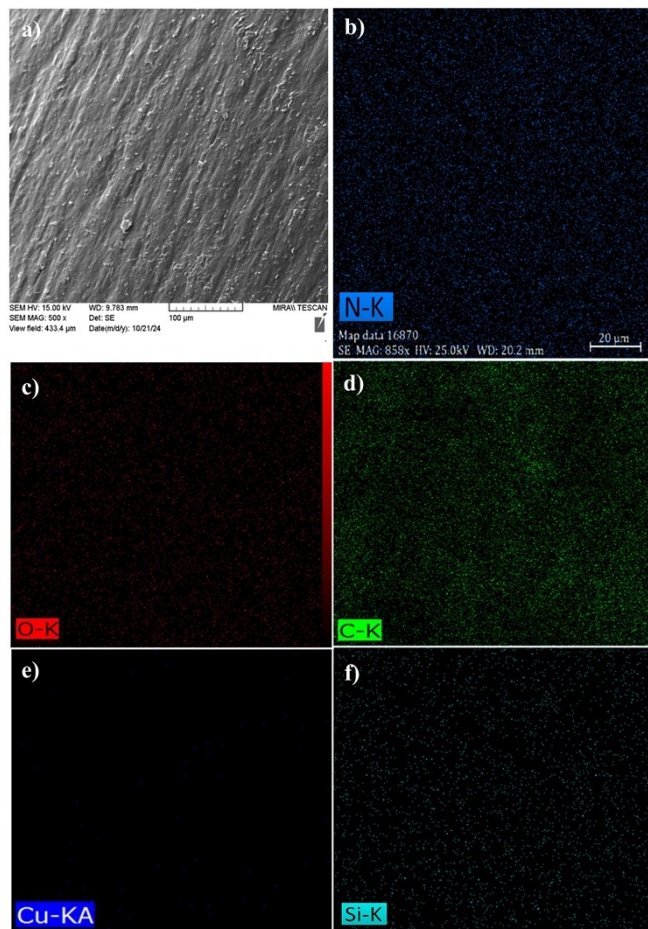

**Figure S5.** Scanning electron microscope (SEM) imaging of (a) the APTES-modified central venous catheters (CVCs); Energy dispersive X-ray analysis (EDX) mapping of (b) nitrogen, (c) oxygen, (d) carbon, (e) copper, and (f) silicon for a cross-section of this sample.

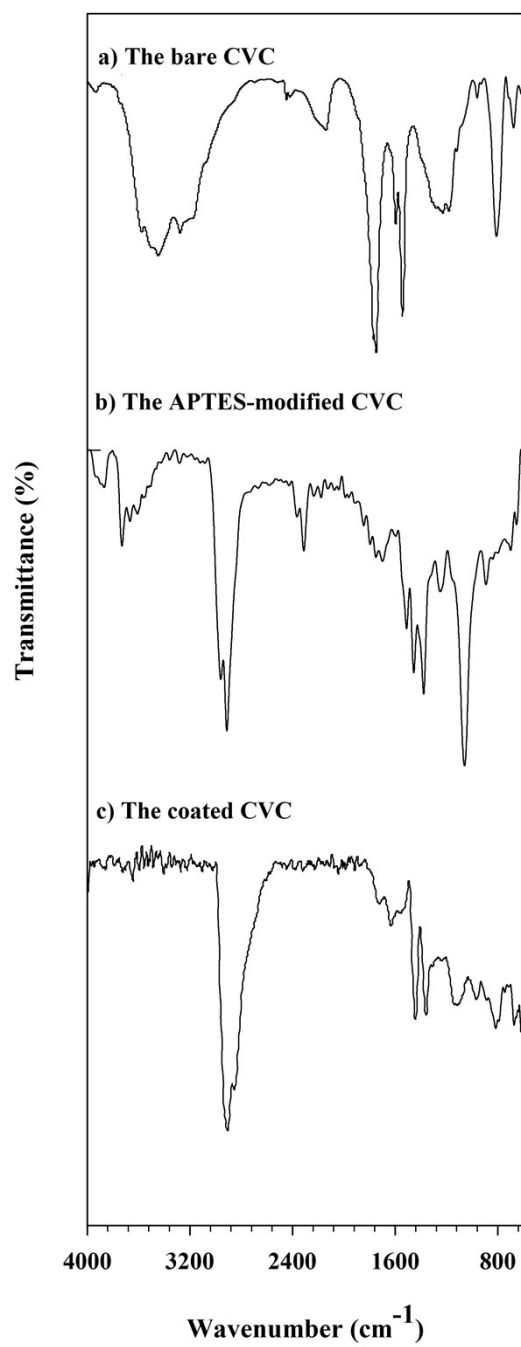

**Figure S6.** Fourier-transform infrared spectroscopy (FTIR) of the bare, APTES-modified, and laccase@Mn<sub>3</sub>(PO<sub>4</sub>)<sub>2</sub>•HNSs/gallic acid-coated central venous catheters (CVCs).

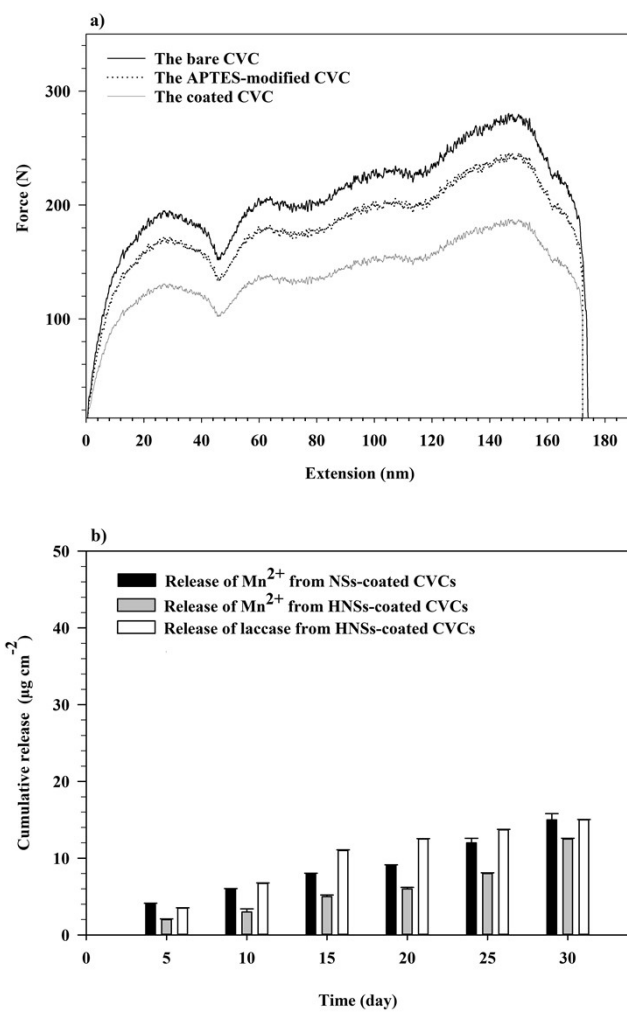

**Figure S7.** The tensile stress of the virgin, APTES-modified, and laccase@ $\text{Mn}_3(\text{PO}_4)_2$ •HNSs/gallic acid-coated central venous catheters (CVCs). The cumulative release of  $\text{Mn}^{2+}$  and laccase from the  $\text{Mn}_3(\text{PO}_4)_2$ •NSs and laccase@ $\text{Mn}_3(\text{PO}_4)_2$ •HNSs coated CVC under mild shaking at 37 °C for 30 days.



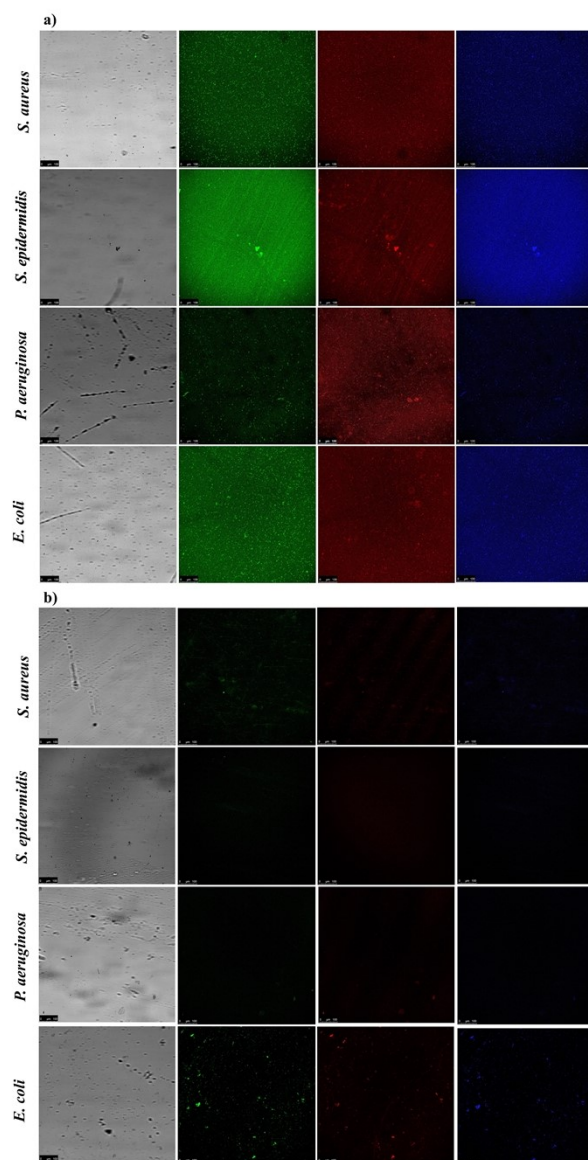

**Figure S8.** Fluorescence microscopic analysis of *Staphylococcus aureus* (*S. aureus*), *Staphylococcus epidermidis* (*S. epidermidis*), *Pseudomonas aeruginosa* (*P. aeruginosa*), and *Escherichia coli* (*E. coli*) biofilms formed after 24 h incubation with (a) the uncoated and (b) laccase@Mn<sub>3</sub>(PO<sub>4</sub>)<sub>2</sub>•HNSs/gallic acid-coated central venous catheters (CVCs). Bacteria were stained with ConA-FITC (green), FM11-43FX (red), and DAPI (blue) for the detection of exopolysaccharide (EPS) residues, bacterial membranes, and nucleic acids, respectively. The scale bar of the picture is 100  $\mu$ m.

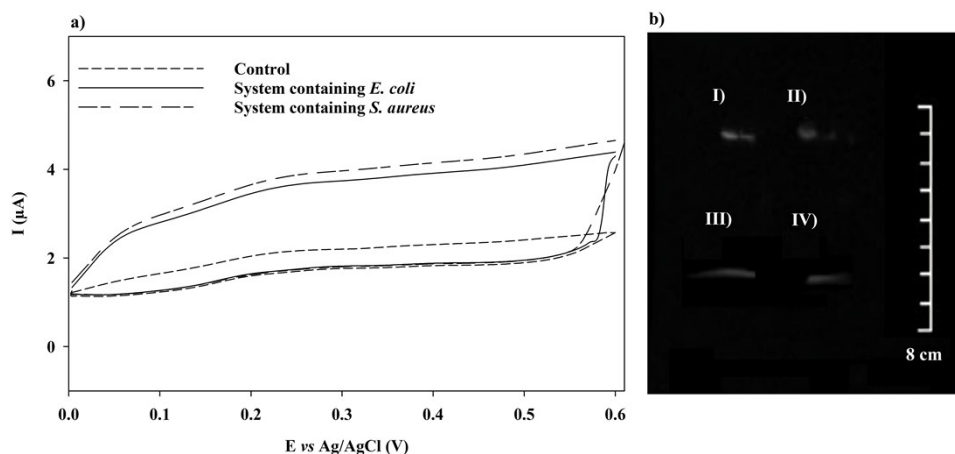

**Figure S9.** (a) Cyclic voltammetry (CV) spectrum of modified electrodes with laccase@ $\text{Mn}_3(\text{PO}_4)_2$ •HNSs to assess redox activity and bacterial cell wall penetration potential. (b) Comparison of computerized tomography (CT) values and magnetic resonance imaging (MRI) between the HNSs-coated CVCs (I) (III) before and after (II) (IV) 15 days of implantation.
